# Supplementary material for: A pyridyl-decorated MOF-505 analogue exhibiting hierarchical porosity, selective CO2 capture and catalytic capacity
Source: Royal Society of Chemistry journal article supplement (doi:10.1039/c5dt01943e), 2015-01-01
Supplement: c5dt01943e1.pdf [file c5dt01943e1.pdf]

## Supplementary Material (ESI) for Dalton Transactions

# A pyridyl-decorated MOF-505analogue exhibiting hierarchical porosity, selective CO<sub>2</sub> capture and catalytic capacity

Qin-Qin Dang,<sup>a</sup> Yu-Fen Zhan,<sup>a</sup> Li-Na Duan<sup>a</sup> and Xian-Ming Zhang<sup>a</sup> \*

School of Chemistry & Material Science, Shanxi Normal University Linfen 041000, P. R. China

### Structure Analysis

Data collection were performed with Mo K $\alpha$  radiation ( $\lambda = 0.71073 \text{ \AA}$ ) on a Bruker Apex CCD diffractometer at 298(2) K for **1**. The SAINT program was used for integration of the diffraction profiles, and the SADABS program was used for X absorption correction. All the structures were solved by direct methods using the SHELXS program and refined by full-matrix least-squares methods with SHELXL. All non-hydrogen atoms were refined with anisotropic thermal parameters. Hydrogen atoms of organic ligands were generated theoretically onto the specific carbon and nitrogen atoms, and refined isotropically with fixed thermal factors. The Hydrogen atoms of the water molecules were calculated by Platon software. The C and N atoms in pyridine ring are positional disordered and have been treated as two equal parts.<sup>1,2</sup>. Thus, the disordered C atoms have occupancy of 0.375 and the disordered N atoms have occupancy of 0.125. Further details for structural analysis, selected bond lengths and bond angles are summarized in **Table S1,2**.

**Table S1.** Crystallographic Data and Structure Refinement for **1**.

| Complex           | <b>1</b>                                                                       |
|-------------------|--------------------------------------------------------------------------------|
| Molecular formula | C <sub>28</sub> H <sub>40</sub> Cu <sub>2</sub> N <sub>2</sub> O <sub>17</sub> |
| M                 | 803.70                                                                         |
| Crystal system    | Trigonal                                                                       |
| Space group       | R -3 m                                                                         |
| a (Å)             | 18.7088(9)                                                                     |
| b (Å)             | 18.7088(9)                                                                     |

|                                              |             |
|----------------------------------------------|-------------|
| c (Å)                                        | 38.2664(14) |
| $\alpha$ (°)                                 | 90          |
| $\beta$ (°)                                  | 90          |
| $\gamma$ (°)                                 | 120         |
| V (Å <sup>3</sup> )                          | 11599.5(11) |
| Z                                            | 9           |
| $\rho_{\text{calc}}$ , (g cm <sup>-3</sup> ) | 0.730       |
| $\mu$ , (mm <sup>-1</sup> )                  | 0.850       |
| F(000)                                       | 2556.0      |
| Reflections collected                        | 15695       |
| Independent reflections                      | 3064        |
| $R_1^a$ [I > 2 $\sigma$ (I)]                 | 0.0330      |
| $wR_2^b$ [I > 2 $\sigma$ (I)]                | 0.0977      |
| R1 (all data)                                | 0.0409      |
| wR2 (all data)                               | 0.1013      |

$$R_1^a = \frac{\sum ||F_o| - |F_c||}{\sum |F_o|}, wR_2^b = \left[ \frac{\sum w(F_o^2 - F_c^2)^2}{\sum w(F_o^2)^2} \right]^{1/2}$$

**Table S2.** Bond lengths [Å] and angles [deg] for complex **1**.

---

complex **1**

---

|                    |            |                    |             |
|--------------------|------------|--------------------|-------------|
| Cu1- Cu1(a)        | 2.6621(5)  | Cu1-O1(b)          | 1.9568 (12) |
| Cu1- O1W           | 2.146(2)   | O2- Cu1(a)         | 1.9649(12)  |
| Cu1- O2(c)         | 1.9649(12) | C6- C7'(d)         | 1.352(6)    |
| C6- N1'(d)         | 1.352(6)   | C7'- C7'(e)        | 1.807(13)   |
| C7'- N1'(e)        | 1.807(13)  | Cu1- O2(a)         | 1.9648(13)  |
| Cu1- O1            | 1.9569(12) | C6- C7'            | 1.352(6)    |
| C7'- C7'(d)        | 1.967(11)  |                    |             |
| O1- Cu1- Cu1(a)    | 84.37(4)   | O1(b)- Cu1- Cu1(a) | 84.37(4)    |
| O1(b)- Cu1- O2(a)  | 89.88(6)   | O1(b)- Cu1- O2(c)  | 167.52(5)   |
| O1- Cu1- O2(a)     | 167.52(5)  | O1(b)- Cu1- O1W    | 98.82(8)    |
| O2(c) -Cu1- Cu1(a) | 83.16(4)   | O2(a)-Cu1- Cu1(a)  | 83.16(4)    |
| O2(a)-Cu1- O1W     | 93.66(8)   | O2(c)-Cu1- O1W     | 93.66(8)    |
| C1-O1- Cu1         | 122.58(12) | C1-O2-Cu1(a)       | 123.67(11)  |
| O1- Cu1-O1(b)      | 88.55(8)   | O1- Cu1- O2(c)     | 89.88(6)    |
| O1- Cu1- O1W       | 98.82(8)   | O2(c)-Cu1- O2(a)   | 88.97(9)    |
| O1W - Cu1-Cu1(a)   | 175.52(10) |                    |             |

<sup>a</sup> 5/3-X, 4/3-Y, 4/3-Z; <sup>b</sup> 1+Y-X, +Y, +Z; <sup>c</sup> 2/3-Y+X, 4/3-Y, 4/3-Z; <sup>d</sup> 1-Y, 1-X, +Z; <sup>e</sup> +Y, +X, 1-Z

**Table S3.** The optimization of reaction condition<sup>a</sup>.

| Entry    | Cat. mol % | TMSCN       | Temp.(K)    | Conv.(%) <sup>b</sup> |
|----------|------------|-------------|-------------|-----------------------|
| 1        | 0          | 2 eq        | 293K        | 4                     |
| 2        | 1          | 2 eq        | 293K        | 76                    |
| <b>3</b> | <b>1</b>   | <b>2 eq</b> | <b>313K</b> | <b>99</b>             |
| 4        | 0.5        | 2 eq        | 313K        | 69                    |

<sup>a</sup>Reaction conditions: Me<sub>3</sub>SiCN (2mmol), aldehyde (1mmol), **1'**, 8h, under N<sub>2</sub> atmosphere. <sup>b</sup>Determined by GC based on the carbonyl substrate.

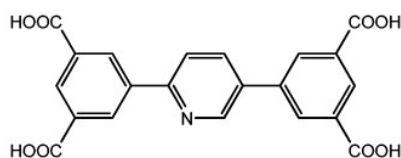

**Scheme 1s.** Schematic structure of the organic linker H<sub>4</sub>L.

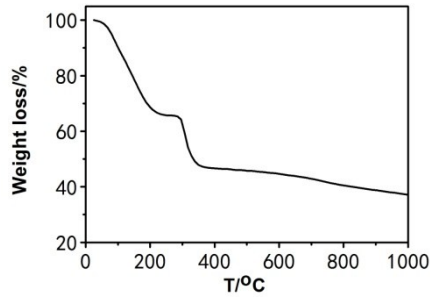

**Fig.S1** The TGA plots of **1**.

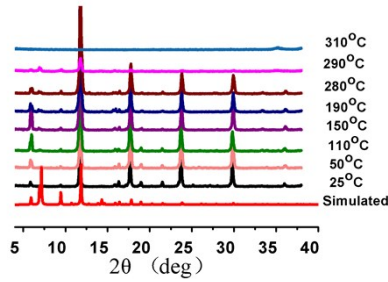

**Fig.S2** Temperature-dependent powder X-ray diffraction data under air atmosphere for **1**.

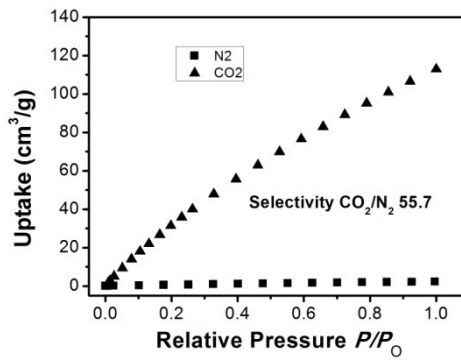

**Fig. S3**  $\text{CO}_2$  and  $\text{N}_2$  adsorption isotherm for **1** at 273K

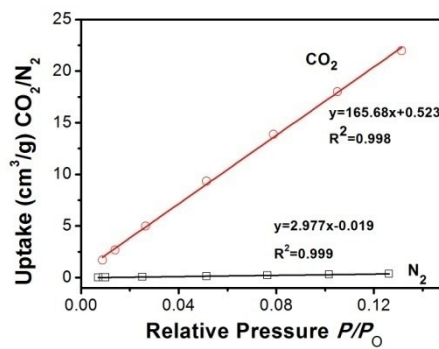

**Fig. S4** The ideal selectivity of  $\text{CO}_2$  over  $\text{N}_2$  calculated by the Henry's Law

#### **Analysis of carbon dioxide adsorption.**

The methods are applied to dispose the sorption data according to the literature. The Langmuir-Freundlich equation is used to fit  $\text{CO}_2$  adsorption isotherm and predict the adsorption capacity of the framework at saturation, and Clausius-Clapeyron equation is applied to the calculation of the

enthalpies of CO<sub>2</sub> adsorption.

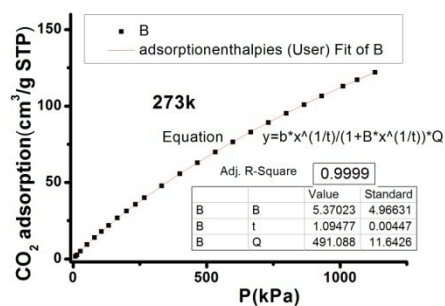

**Fig. S5** Carbon dioxide isotherm at 273 K (symbols) and Langmuir-Freundlich equation fits (line)

for 1'.

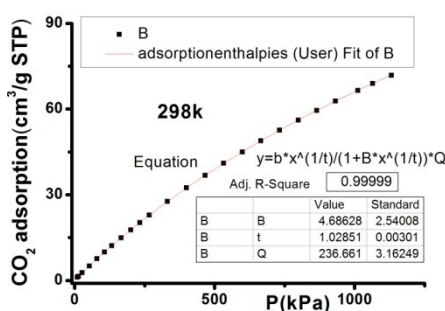

**Fig. S6** Carbon dioxide isotherm at 298 K (symbols) and Langmuir-Freundlich equation fits (line)

for 1'.

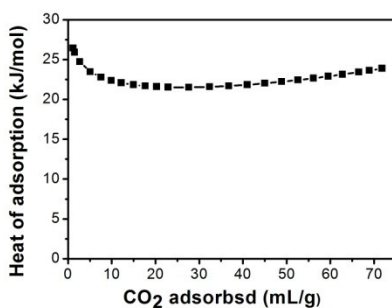

**Fig.S7**The isosteric heat of adsorption of 1'.

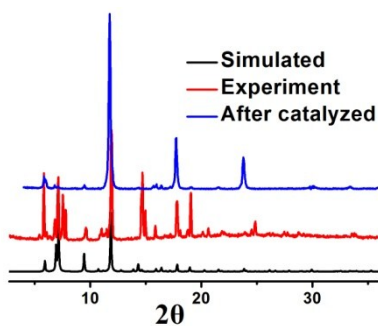

**Fig. S8**The PXRD patterns of simulated, experimented and after catalyzed for 1.

## References

1. Q. Li and S. Du, *RSC Adv.*, 2015, 5, 9898-9903.
2. Q. Li and S. Du, *RSC Adv.*, 2014, 4, 30963-30967.
